# Supplementary material for: Thermally induced intermetallic Rh1Zn1 nanoparticles with high phase-purity for highly selective hydrogenation of acetylene
Source: Royal Society of Chemistry journal article supplement (doi:10.1039/d3sc05460h), 2023-12-23
Supplement: d3sc05460h1.pdf [file d3sc05460h1.pdf]

## Supplementary Information for

# Thermal-induced Intermetallic Rh<sub>1</sub>Zn<sub>1</sub> Nanoparticles with High Phase-purity for Highly Selective Hydrogenation of Acetylene

Xiaocheng Lan<sup>‡</sup>, Yu Wang<sup>‡</sup>, Boyang Liu, Zhenyu Kang, and Tiefeng Wang\*

Beijing Key Laboratory of Green Reaction Engineering and Technology, Department of Chemical Engineering, Tsinghua University

## Experimental Procedures

### Catalyst preparation

All monometallic samples were prepared by incipient wetness impregnation using commercial SiO<sub>2</sub> (Alfa Aesar, 147 m<sup>2</sup>/g) as the support. The RhO<sub>x</sub>/SiO<sub>2</sub> was prepared with H<sub>3</sub>RhCl<sub>6</sub> as the precursor. H<sub>3</sub>RhCl<sub>6</sub> aqueous solution was prepared with a 3:1 molar ratio of HCl to RhCl<sub>3</sub> (99.9%, Alfa Aesar) and was added to the SiO<sub>2</sub> support with stirring. The mixture was sonicated for 1 h and then dried at 80 °C overnight. The dried sample was calcined in air at 400 °C for 2 h. For ZnO/SiO<sub>2</sub>, PtO<sub>x</sub>/SiO<sub>2</sub>, and PdO<sub>x</sub>/SiO<sub>2</sub>, the synthesis procedure was similar except that the metal precursor was Zn(NO<sub>3</sub>)<sub>2</sub>·6H<sub>2</sub>O (Alfa Aesar), H<sub>2</sub>PtCl<sub>6</sub>·6H<sub>2</sub>O (Alfa Aesar), and H<sub>2</sub>PdCl<sub>4</sub> (prepared with a 2:1 molar ratio of HCl to PdCl<sub>2</sub>), respectively. The metal loading of MO<sub>x</sub>/SiO<sub>2</sub> for preparing M-Zn/SiO<sub>2</sub> (M = Rh, Pt, Pd) by Zn-ETO was 5.0%. The Rh metal loading of RhO<sub>x</sub>/SiO<sub>2</sub> for preparing the Rh-Zn/SiO<sub>2</sub>-t catalysts by Zn-ETO was 0.5%. The Zn metal loading of ZnO/SiO<sub>2</sub> for preparing the Rh-Zn/SiO<sub>2</sub>-t catalysts by Zn-ETO was 2.0%. RhZn/SiO<sub>2</sub>-IMP (with a Rh metal loading of 0.5% and a 1:1 molar ratio of Rh to Zn) was prepared by co-impregnation. H<sub>3</sub>RhCl<sub>6</sub> and Zn(NO<sub>3</sub>)<sub>2</sub>·6H<sub>2</sub>O aqueous solutions were premixed and added to the SiO<sub>2</sub>. The mixture was sonicated for 1 h, dried at 80 °C overnight, calcined in air at 400 °C for 2 h, and reduced at 400 °C for 4 h.

### Characterization

HAADF-STEM and EDX images were obtained using a transmission electron microscope (FEI Titan Cubed G2 300) at 300 kV equipped with an aberration corrector for the probe-forming optics. All samples were ultrasonically dispersed in ethanol for 30 min and then dropped onto a carbon film supported on a copper grid. The particle size distribution was obtained by collecting more than 100 particles. XPS analysis of the reduced catalysts were performed on a Thermo-Fisher ESCALAB 250Xi instrument with an Al K $\alpha$  X-ray source. For XPS and HAADF-STEM characterizations, the reduced samples were kept in vacuum condition before measurement to prevent oxidation. In situ XRD patterns were obtained on a Bruker D8 Advance diffractometer using CuK $\alpha$  radiation at 40 kV with a scanning rate of 1°/min. All MO<sub>x</sub>/SiO<sub>2</sub> (M = Rh, Pt, Pd) samples were mixed with commercial ZnO (Alfa Aesar) and placed on the in situ plate for XRD analysis. The temperature program had four stages: in the first stage, the temperature was ramped to and kept constant at 300 °C for 1 h to simulate the metal reduction stage; in the second stage, it was ramped to and kept constant at 400 °C for 4 h to investigate the trapping and ordering process; in the third and fourth stages, it was ramped and kept constant at 500 °C and 600 °C for 2 h, respectively, to investigate the temperature effect on the trapping and ordering process. Each XRD scan was carried out for 20 min during the constant temperature section, and the samples were directly tested without taking out to expose to air. The ramping rate was 0.2 °C/s and the reducing atmosphere was 10% H<sub>2</sub>/He. CO-FTIR spectra were collected on a Nicolet Nexus 470 spectrometer (Thermo Scientific) equipped with a mercury cadmium telluride (MCT-A) detector and vacuum system. Spectra were obtained with a resolution of 4 cm<sup>-1</sup> using 64 and 32 scans for the background and samples, respectively. The catalyst was mixed with blank SiO<sub>2</sub> support with a weight ratio of 1:1 and finely ground. A 15 mg portion of the mixed sample was pressed onto a tungsten mesh and set inside the measurement cell. The sample was pretreated at 400 °C in a reducing atmosphere (11.0 kPa and 20% H<sub>2</sub> with He balance) for 1 h, and then the cell was purged with He three times followed by being kept under vacuum for 0.5 h to remove impurities on the catalyst surface. Finally, the cell was filled with 10% CO gas (balanced with He), then evacuated until the pressure decreased below 5.0×10<sup>-3</sup> Pa to collect the CO-FTIR spectra. TGA was performed with a TGA/DSC1/1600LF instrument with a heating rate of 10 °C/min under air flow.

## Catalytic reaction

Acetylene hydrogenation was carried out in a quartz fixed bed reactor of 7 mm inner diameter equipped with a K type thermocouple inserted into the catalyst bed to measure the temperature. Fresh  $\text{RhO}_x/\text{SiO}_2$  (0.1g) and  $\text{ZnO}/\text{SiO}_2$  (0.1g) catalysts were well mixed and the mixed powder was loaded into the reactor tube. The sample was pretreated with the procedure for Zn-ETO and cooled to 80 °C under  $\text{N}_2$  flow before the catalytic test, the samples after reduction process were directly tested without taking out to expose to air. Acetylene hydrogenation was carried out with a gas flow of 100 mL/min containing 1%  $\text{C}_2\text{H}_2$ , 15%  $\text{H}_2$ , and  $\text{N}_2$  as the balance gas. The outlet stream was analyzed online by a gas chromatograph equipped with a FID detector and a HP-AL/S PLOT column, the details of which were given in our previous work.<sup>1</sup> The conversion of acetylene and the selectivities to ethylene, ethane,  $\text{C}_4$ , and GO were calculated as

$$S_{\text{C}_2\text{H}_4} = \frac{n_{\text{C}_2\text{H}_4}}{n_{\text{C}_2\text{H}_2,\text{in}} - n_{\text{C}_2\text{H}_2,\text{out}}} \times 100\%$$

$$S_{\text{C}_2\text{H}_6} = \frac{n_{\text{C}_2\text{H}_6}}{n_{\text{C}_2\text{H}_2,\text{in}} - n_{\text{C}_2\text{H}_2,\text{out}}} \times 100\%$$

$$S_{\text{C}_4} = \frac{2 \times n_{\text{C}_4}}{n_{\text{C}_2\text{H}_2,\text{in}} - n_{\text{C}_2\text{H}_2,\text{out}}} \times 100\%$$

$$S_{\text{GO}} = 1 - S_{\text{C}_2\text{H}_4} - S_{\text{C}_2\text{H}_6} - S_{\text{C}_4}$$

where  $n_{\text{C}_2\text{H}_4}$ ,  $n_{\text{C}_2\text{H}_6}$ ,  $n_{\text{C}_4}$  and  $n_{\text{C}_2\text{H}_2,\text{out}}$  were the moles of each compound in the outlet gas, and  $n_{\text{C}_2\text{H}_2,\text{in}}$  was the moles of acetylene in the inlet gas determined by a bypass run prior to each test.

## Computational calculation

The Zn-ETO process and  $\text{C}_4$  formation were studied by DFT calculations with the Vienna Ab initio Simulation Package (VASP).<sup>2-3</sup> Electron-ion and electron-electron interactions were described by the projected augmented wave (PAW) method<sup>4-5</sup> and the Perdew-Burke-Ernzerhof (PBE) exchange-correlation functional<sup>6</sup>, respectively. A 400 eV kinetic cutoff energy and 0.1 eV Gaussian smearing width were set for structure optimization and the transitional state search. The Brillouin zone was sampled with 3×3×1 Monkhorst-Pack k-point mesh. Transitional states were optimized with the climbing image nudged elastic band (CI-NEB) method.<sup>7</sup> Projected density of states (PDOS) and d-band center of Rh(111) and RhZn(110) surfaces were calculated using 2001 points. Bader charge analysis was employed to calculate the charge partitioning. The ZnO, Rh and RhZn crystal structures were obtained from Materials Project.<sup>8</sup> For the reaction calculation, a 2×2 supercell and 3 layer slab model were used to simulate  $\text{C}_4$  formation, with at least 20 Å vacuum between slabs to exclude vertical interactions. The top two layers were relaxed and the bottom layer was fixed to represent the bulk phase. For the Zn-ETO process, the energy change due to Zn evaporation was calculated using a ZnO (221) surface and a 2×1 supercell was applied. VASPKIT<sup>9</sup> was used for the calculation of the Gibbs free energy.

For C<sub>4</sub> formation, the adsorption energy was calculated as

$$E_{ads} = E_{surface+adsorbate} - E_{surface} - E_{adsorbate}$$

where  $E_{surface+adsorbate}$  was the calculated energy of the surface with adsorbate on it, and  $E_{surface}$  and  $E_{adsorbate}$  were the calculated energies of the bare surface and gaseous adsorbate (reactant or product), respectively.

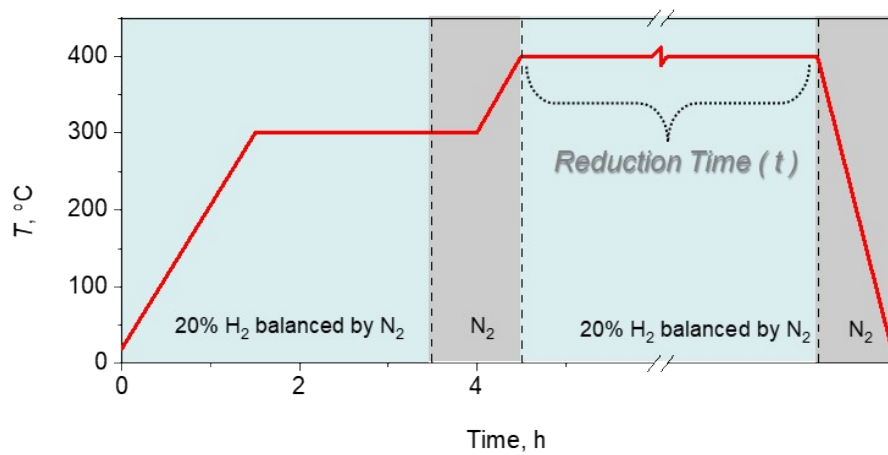

**Figure S1.** The temperature programmed reduction procedure. The temperature was first set to 300 °C for 2 h with 50 ml/min of 20% H<sub>2</sub> gas balanced by N<sub>2</sub> and then increased to 400 °C for a reduction time of  $t$  h.

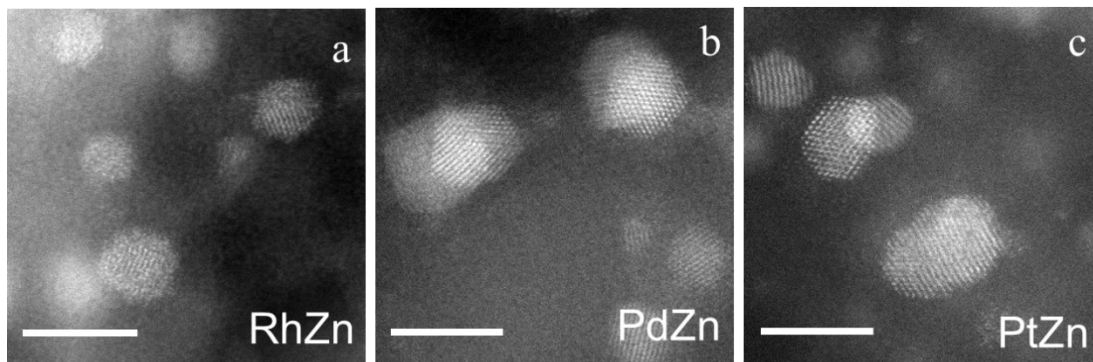

**Figure S2.** HAADF-STEM images of (a) Rh-Zn/SiO<sub>2</sub>, (b) Pd-Zn/SiO<sub>2</sub>, and (c) Pt-Zn/SiO<sub>2</sub>. All scale bars in this figure are 5 nm.

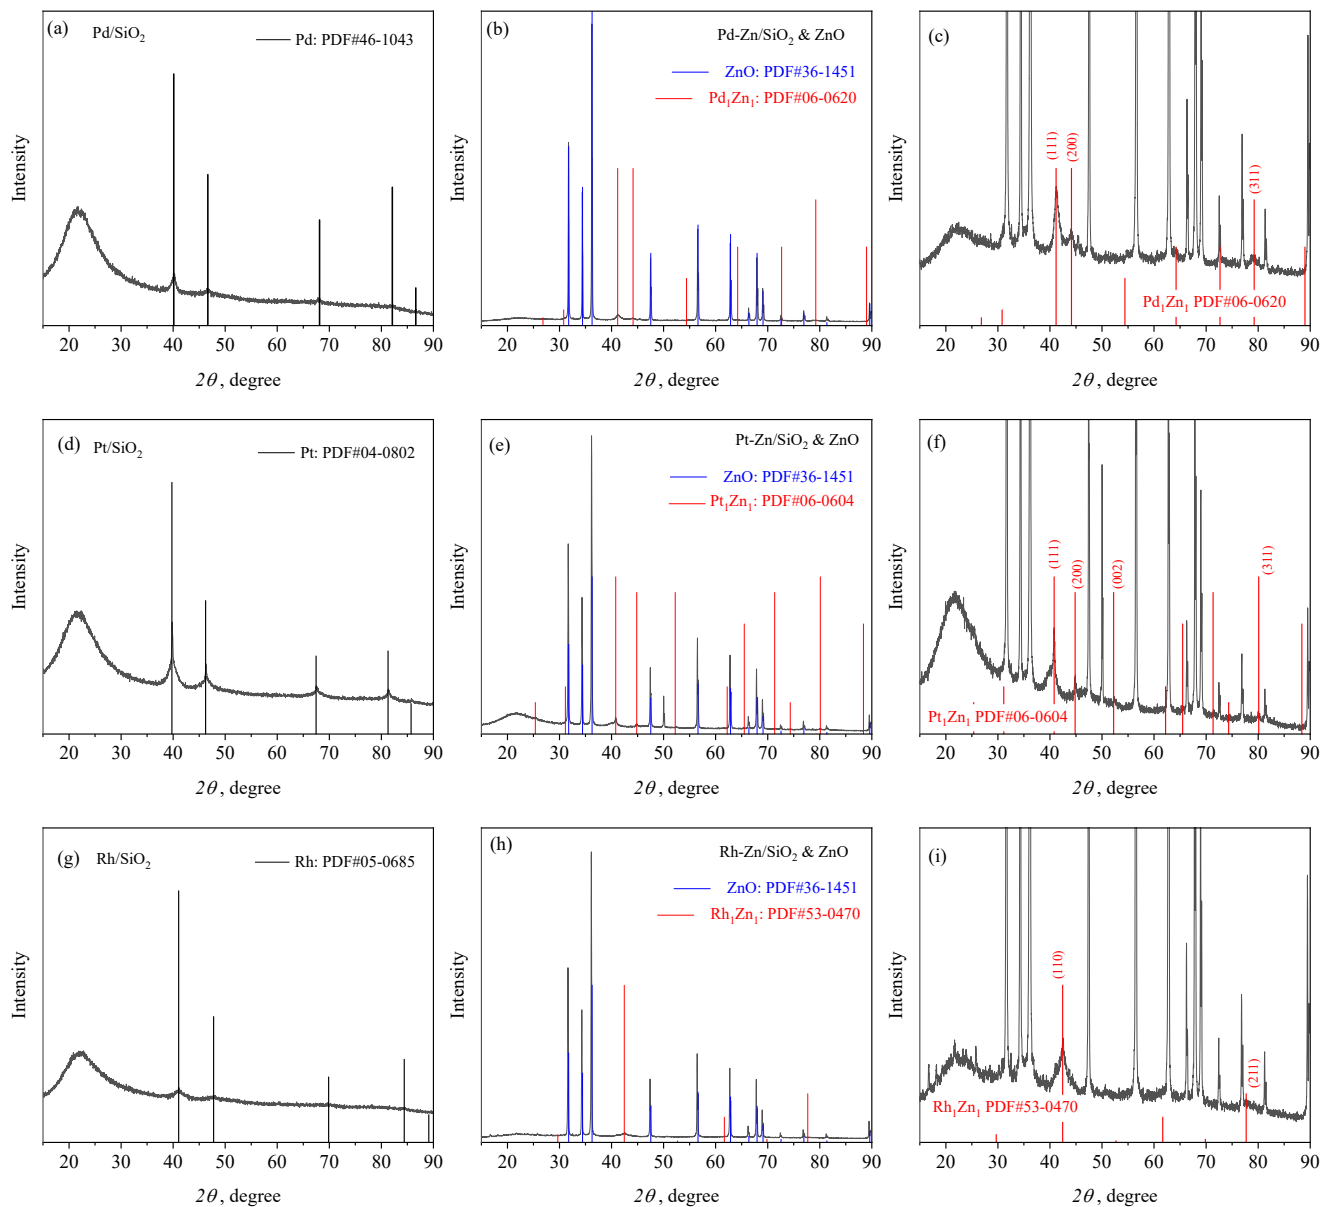

**Figure S3.** XRD patterns of Pd/SiO<sub>2</sub> (a), Pd-Zn/SiO<sub>2</sub> (b and c), Pt/SiO<sub>2</sub> (d), Pt-Zn/SiO<sub>2</sub>(e and f), Rh/SiO<sub>2</sub> (g), and Rh-Zn/SiO<sub>2</sub> (h and i). The patterns in c, f and i are the enlarged patterns of b, e and f.

(a)

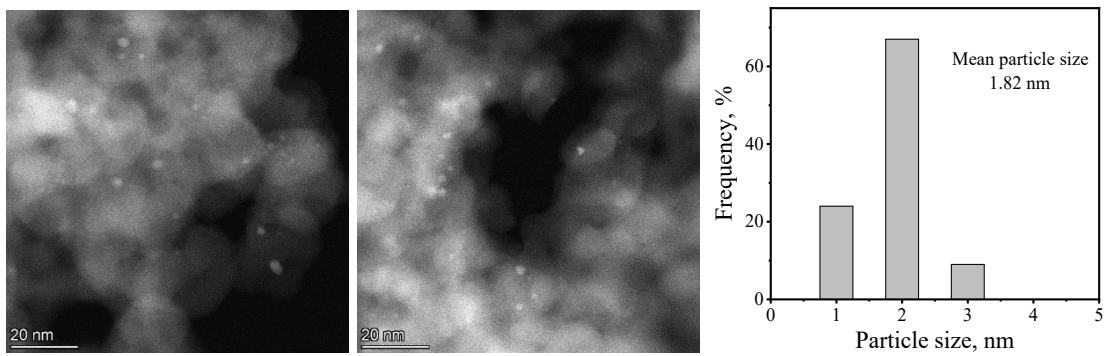

(b)

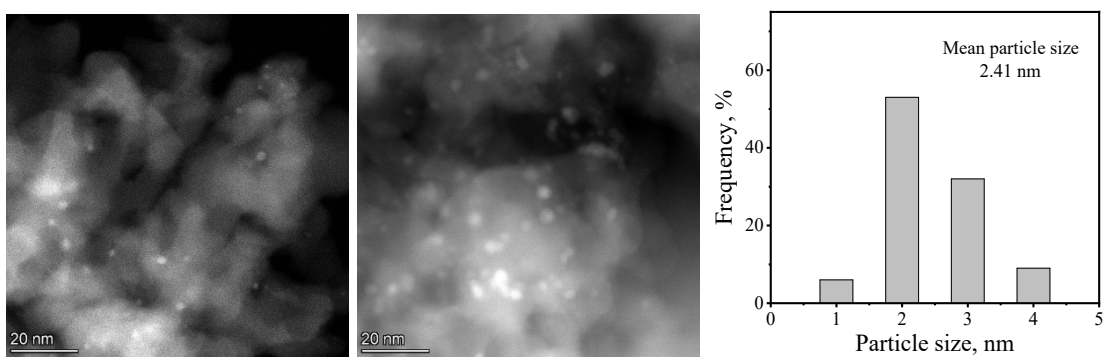

**Figure S4.** HAADF-STEM images of the catalysts. a, Rh-Zn/SiO<sub>2</sub>-0. b, Rh-Zn/SiO<sub>2</sub>-10



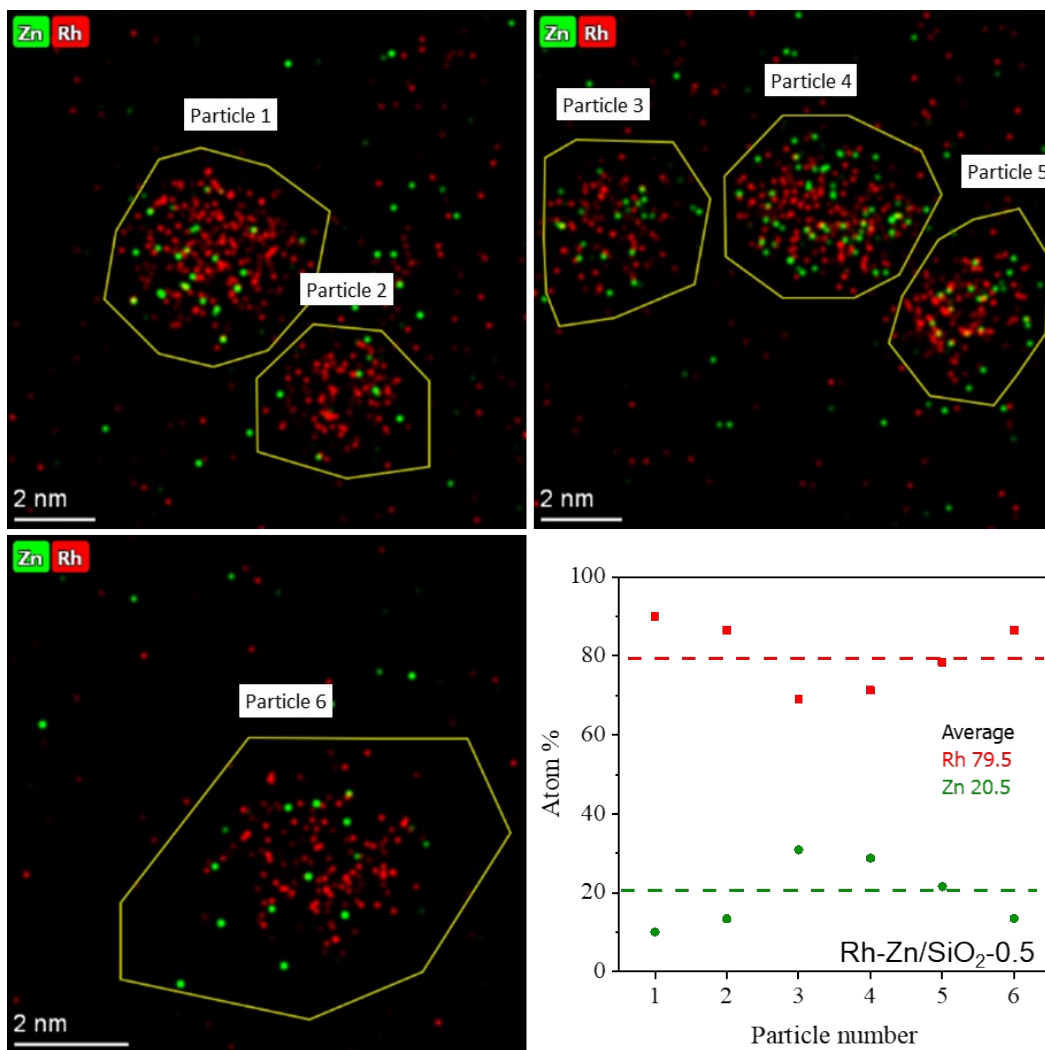

Figure S5. STEM-EDS analysis of Rh-Zn/SiO<sub>2</sub>-0.5

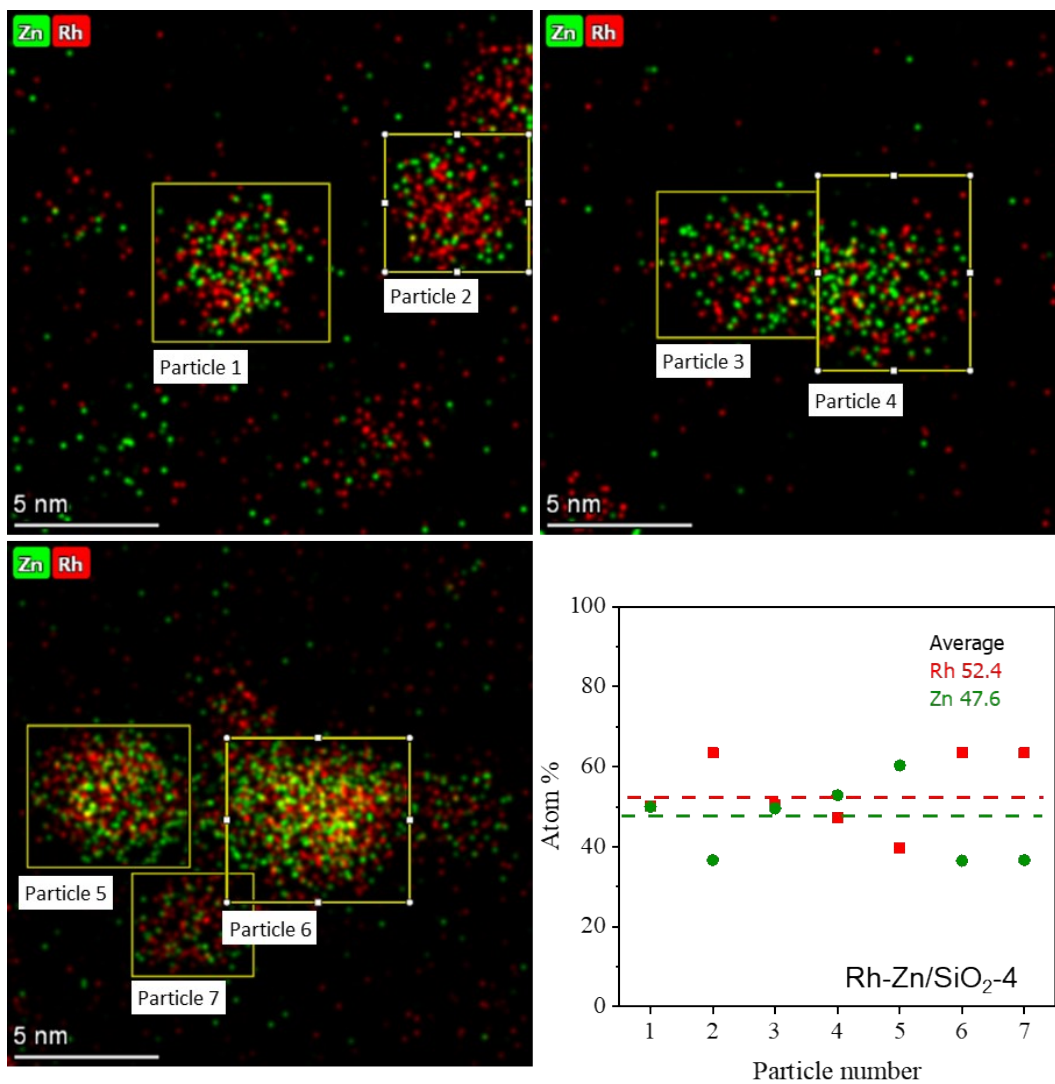

Figure S6. STEM-EDS analysis of Rh-Zn/SiO<sub>2</sub>-4

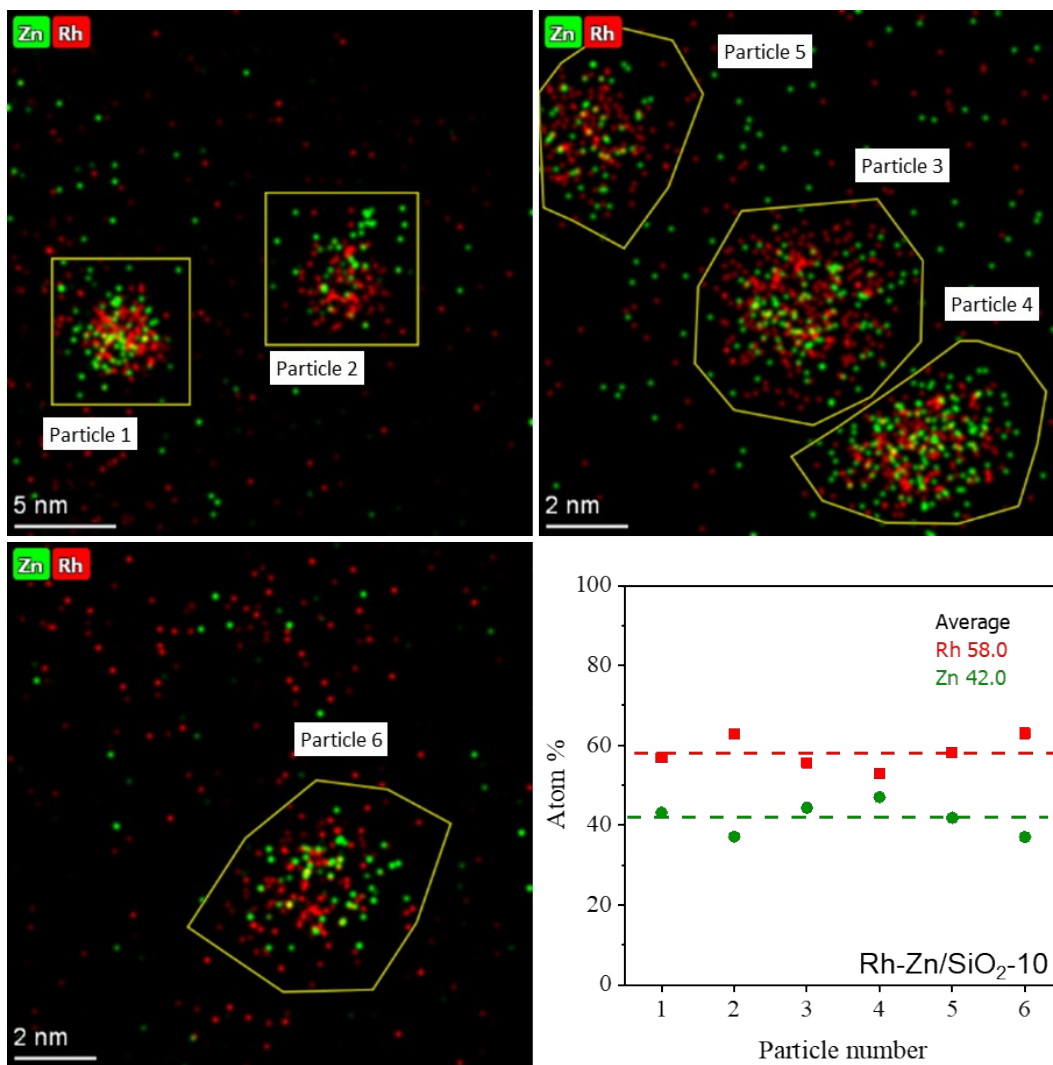

Figure S7. STEM-EDS analysis of Rh-Zn/SiO<sub>2</sub>-10

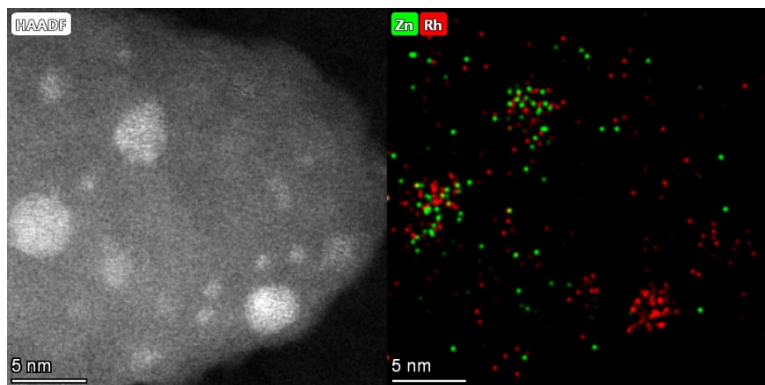

**Figure S8.** HAADF-STEM and EDX images of RhZn/SiO<sub>2</sub>-IMP.

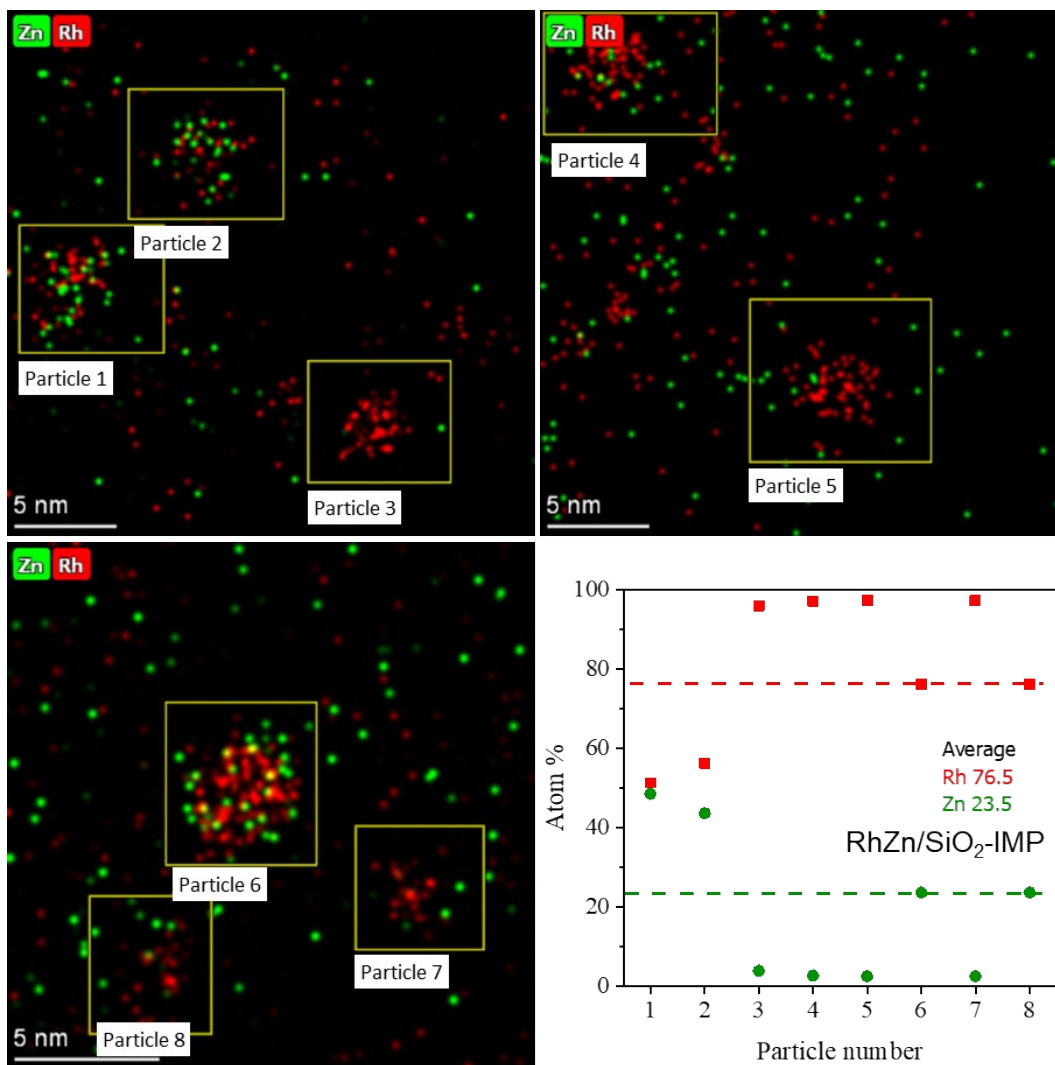

(a)

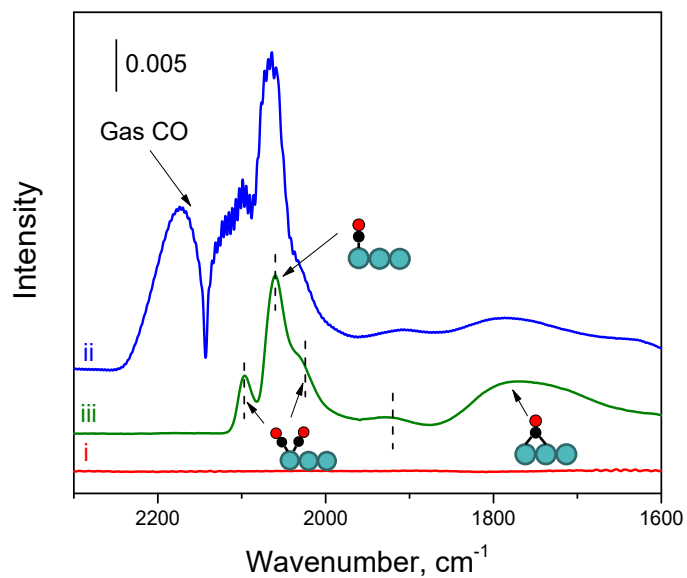

(b)

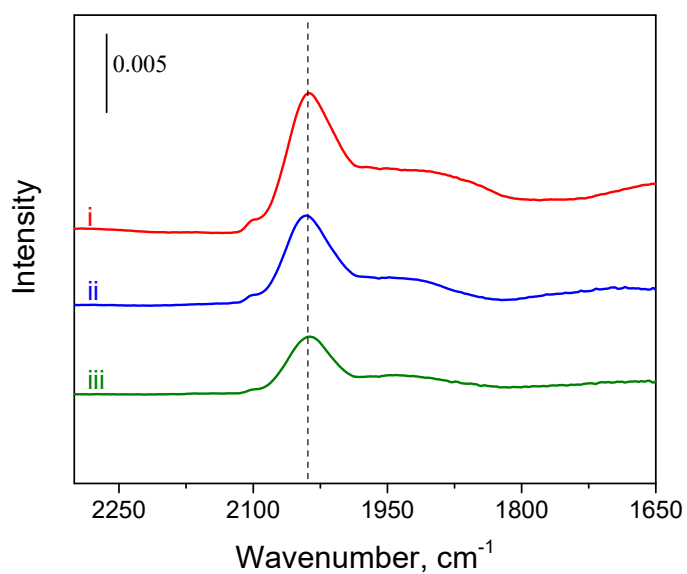

**Figure S10.** FTIR spectra of the catalysts after CO adsorption. a, FTIR spectra of Rh-Zn/SiO<sub>2</sub>-0, before adding CO (i), adding 10% CO at ~5 kPa (ii), and after evacuating to 5.0 × 10<sup>-3</sup> Pa (iii). b, CO adsorption over RhZn/SiO<sub>2</sub>-IMP reduced at 400 °C for 2 h (i), 4 h (ii), and 10 h (iii). Each CO-FTIR characterization used the same procedure (i-iii) of Rh-Zn/SiO<sub>2</sub>-0 in Figure S9a. The FTIR spectra of CO adsorption for RhZn/SiO<sub>2</sub>-IMP in Figure S9b were obtained after evacuation to 5.0 × 10<sup>-3</sup> Pa.

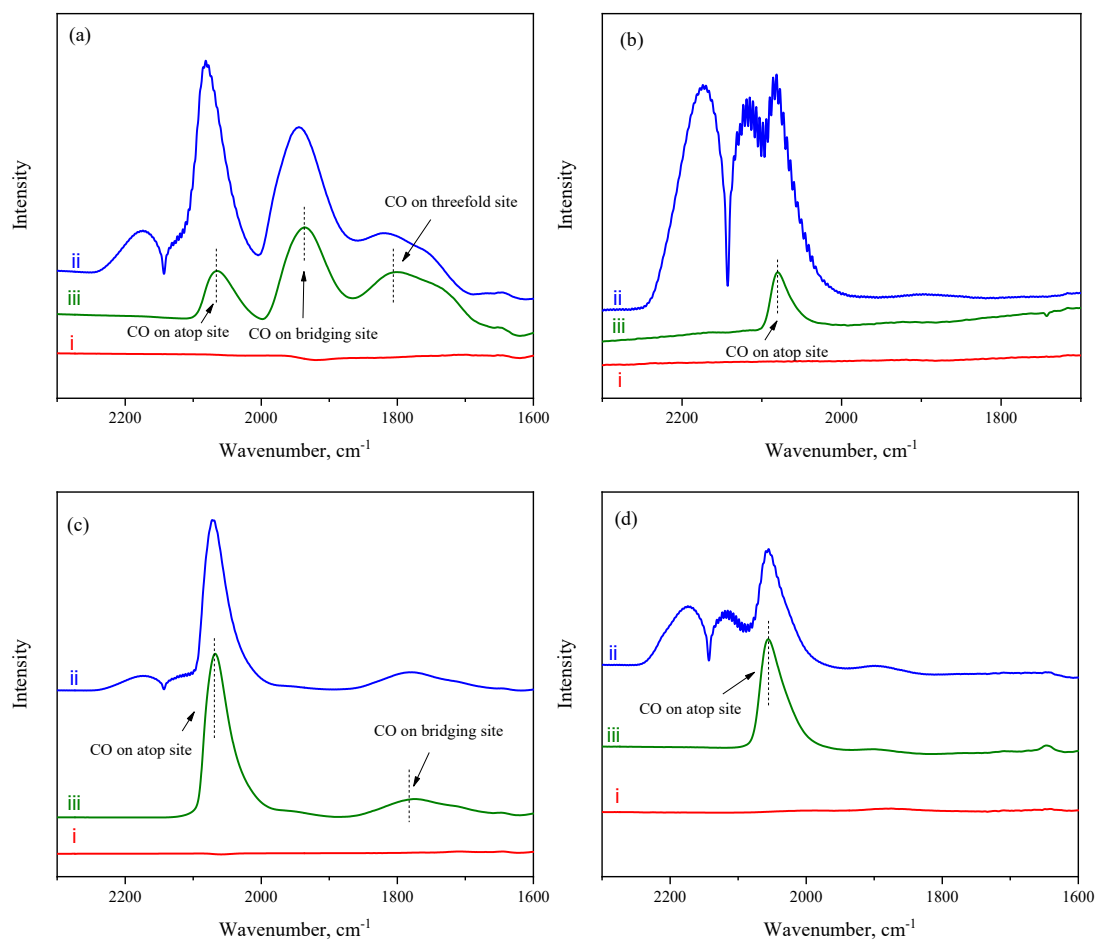

**Figure S11.** CO-FTIR spectra of Pd/SiO<sub>2</sub> (a), Pd-Zn/SiO<sub>2</sub> (b), Pt/SiO<sub>2</sub> (c) and Pt-Zn/SiO<sub>2</sub> (d). Before adding CO (i), adding 10% CO at ~5 kPa (ii), and after evacuating to 5.0×10<sup>-3</sup> Pa (iii). The IR spectrum of Pd/SiO<sub>2</sub> contained a large peak at 1940 cm<sup>-1</sup> and a smaller peak at 2066 cm<sup>-1</sup> which corresponded to the CO adsorbed on bridging site and atop site on Pd, respectively. In addition, Pd/SiO<sub>2</sub> exhibited a broad peak of CO adsorbed on threefold Pd site at 1800 cm<sup>-1</sup>. By trapping Zn atoms, the Pd<sub>1</sub>Zn<sub>1</sub> intermetallic phase was formed. The isolated Pd sites favored CO adsorption on atop sites for, and thus the IR spectrum of Pd-Zn/SiO<sub>2</sub> only exhibited the peak of CO adsorbed on atop site. Similarly, compared with Pt/SiO<sub>2</sub>, Pt-Zn/SiO<sub>2</sub> only showed the peak of CO on atop site.

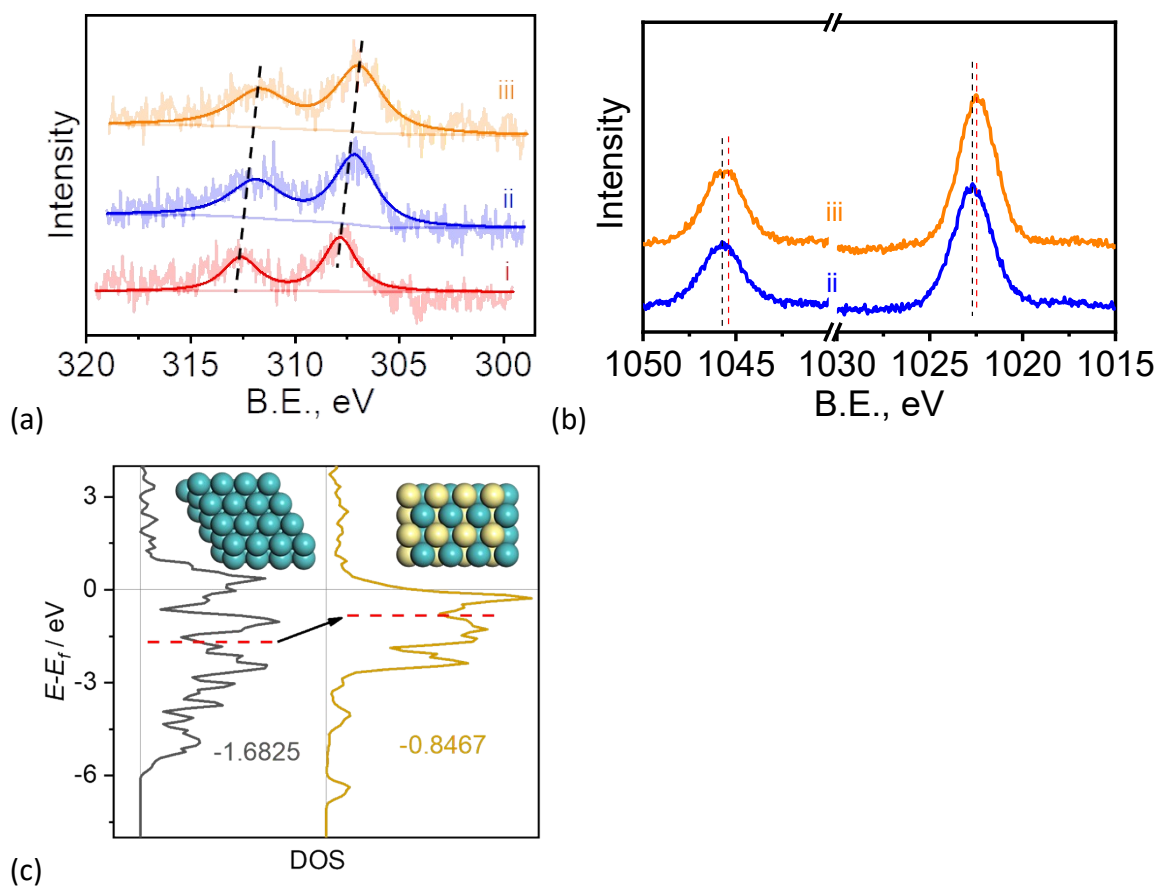

**Figure S12.** (a) Rh 3d and (b) Zn 2p XPS analysis of Rh-Zn/SiO<sub>2</sub>-0 (i), Rh-Zn/SiO<sub>2</sub>-0.5 (ii), and Rh-Zn/SiO<sub>2</sub>-4 (iii). (c) d-band center of Rh and Rh<sub>1</sub>Zn<sub>1</sub>.



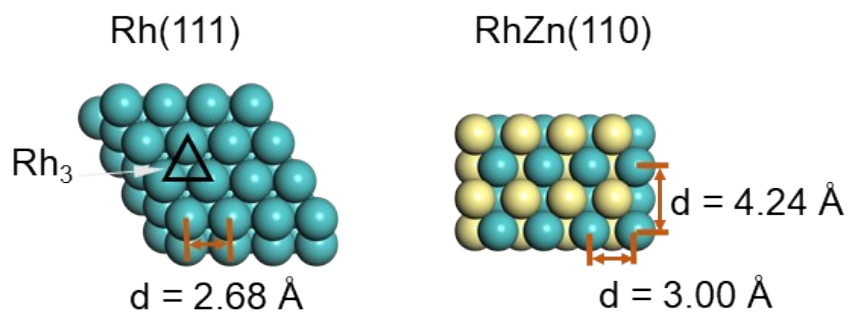

**Figure S13.** Surface Rh atom distribution over Rh(111) and RhZn(110).

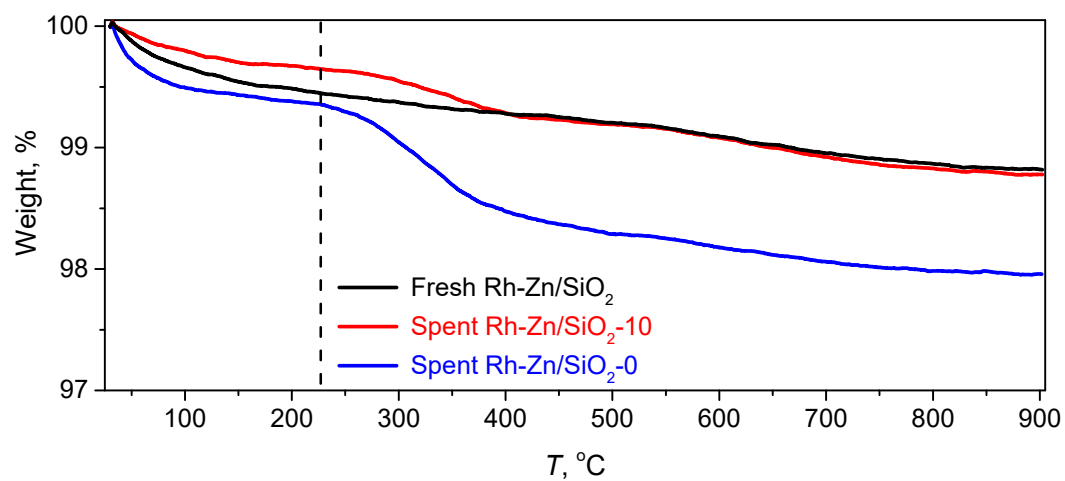

**Figure S14.** TGA results of fresh and spent catalysts. Spent Rh-Zn/SiO<sub>2</sub>-10 and spent Rh-Zn/SiO<sub>2</sub>-0 were the catalysts after evaluation by the temperature programmed reaction in Figure 1. Fresh catalyst Rh-Zn/SiO<sub>2</sub> was treated by the same reduction procedure as Rh-Zn/SiO<sub>2</sub>-0.

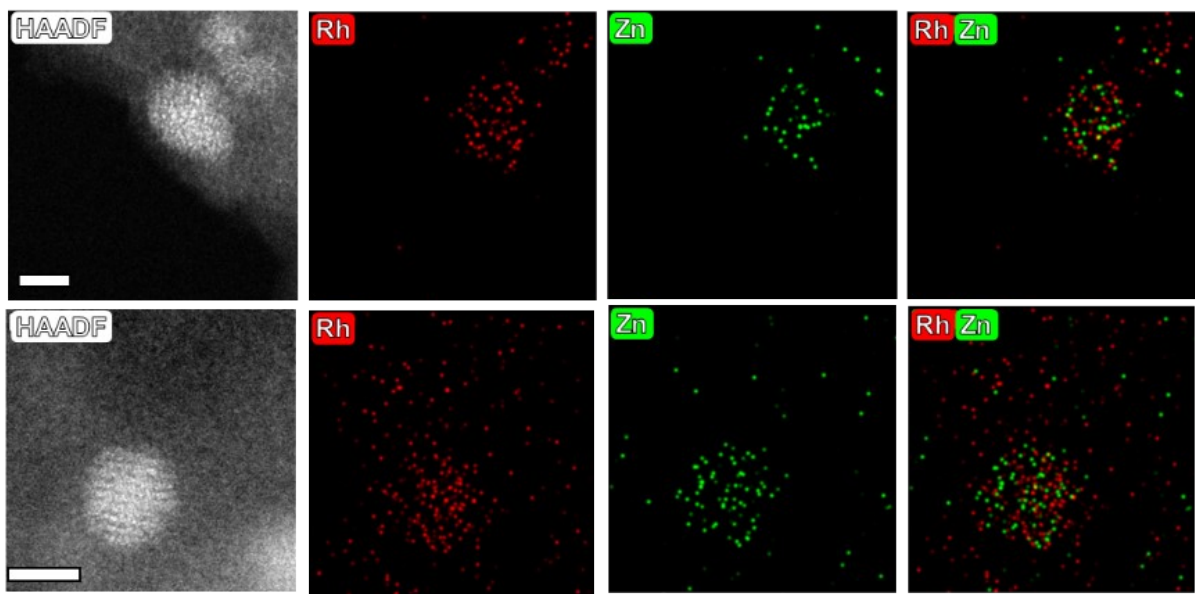

**Figure S15.** HAADF-STEM images and EDS mappings of the spent Rh-Zn/SiO<sub>2</sub>-10.

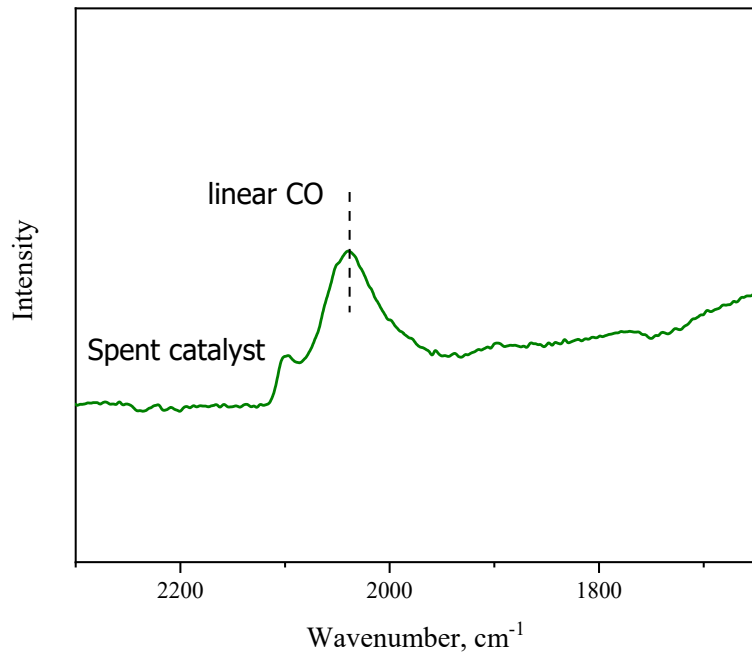

**Figure S16.** CO adsorption on the spent Rh-Zn/SiO<sub>2</sub>-10.

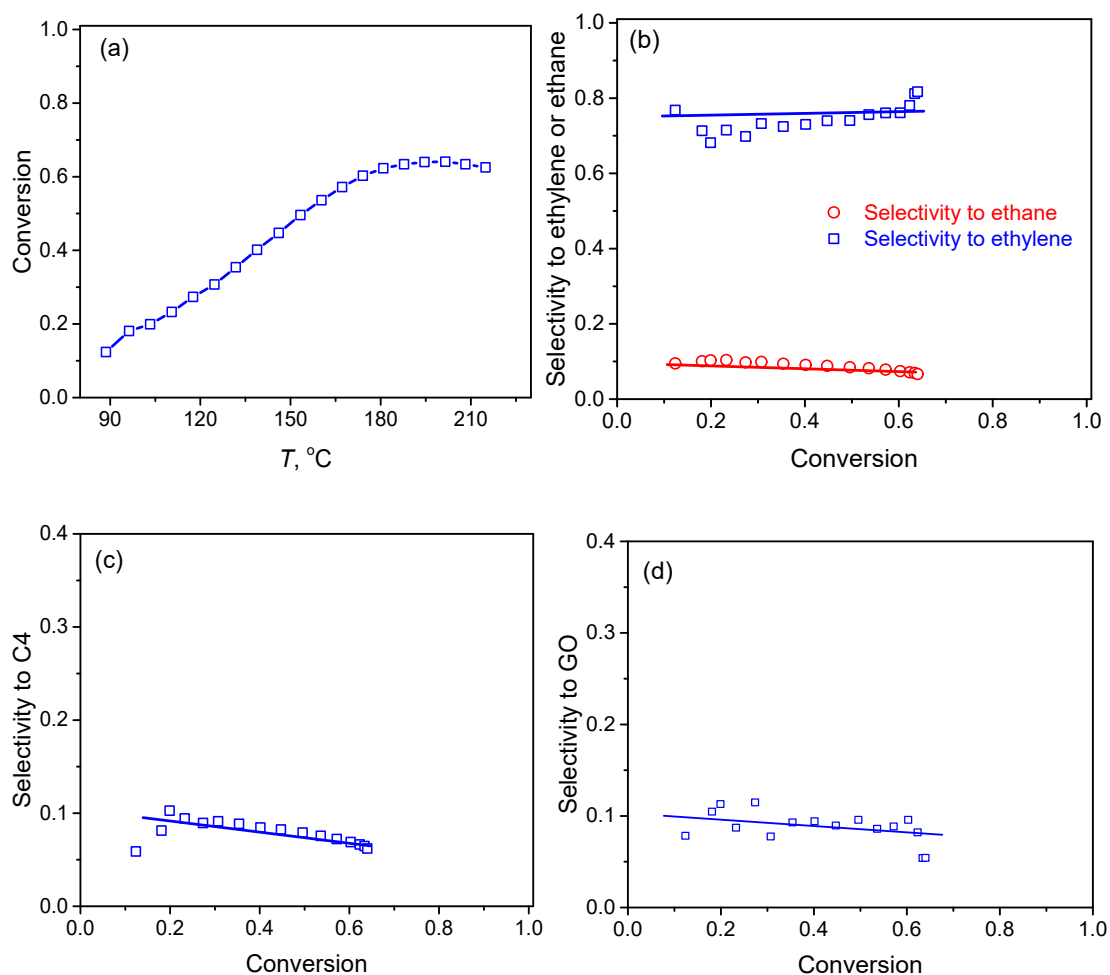

**Figure S17.** Acetylene hydrogenation over RhZn/SiO<sub>2</sub>-IMP. a, Acetylene conversion during the temperature programmed reaction. b-d, Selectivity to ethylene (b), ethane (b), C<sub>4</sub> (c) and GO (d) versus acetylene conversion. 0.1 g RhZn/SiO<sub>2</sub>-IMP catalyst was mixed with 0.1 g blank SiO<sub>2</sub> and reduced at 400 °C for 2 h before evaluation. The temperature programmed reaction was performed under the same conditions as Rh-Zn/SiO<sub>2</sub>-t.

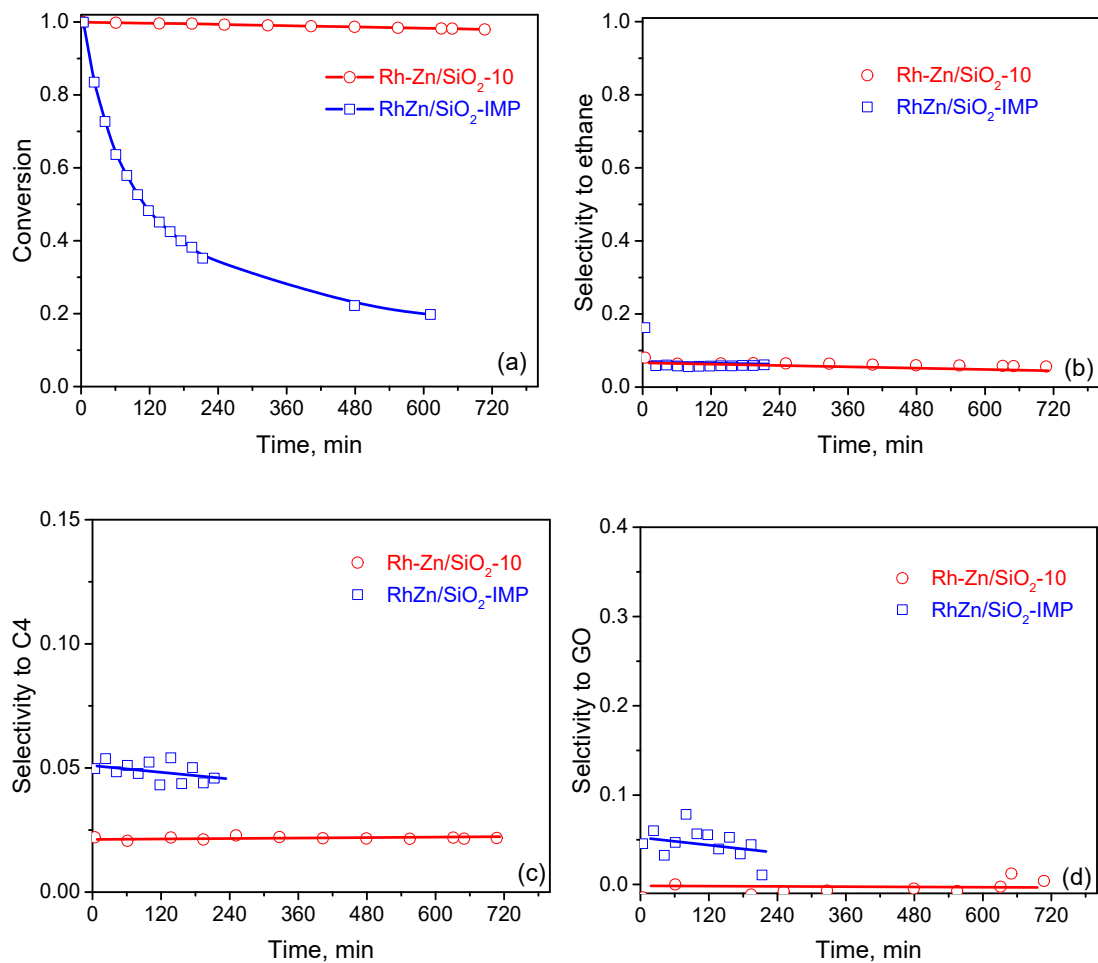

**Figure S18.** Catalyst stability evaluation of Rh-Zn/SiO<sub>2</sub>-10 and RhZn/SiO<sub>2</sub>-IMP. a, Acetylene conversion during stability evaluation. b-d, Selectivity to ethane (b), C<sub>4</sub> (c) and GO (d) during stability evaluation. Catalyst stability was evaluated at 217 °C with a gas flow of 100 mL/min containing 1% C<sub>2</sub>H<sub>2</sub>, 15% H<sub>2</sub>, and N<sub>2</sub> as the balance gas. For RhZn/SiO<sub>2</sub>-IMP, 0.1 g RhZn/SiO<sub>2</sub>-IMP sample was mixed with 0.1 g blank SiO<sub>2</sub> and reduced at 400 °C for 2 h before evaluation. For Rh-Zn/SiO<sub>2</sub>-10, 0.1 g Rh/SiO<sub>2</sub> was mixed with 0.1 g ZnO/SiO<sub>2</sub> and treated by TPR for 10 h before evaluation.

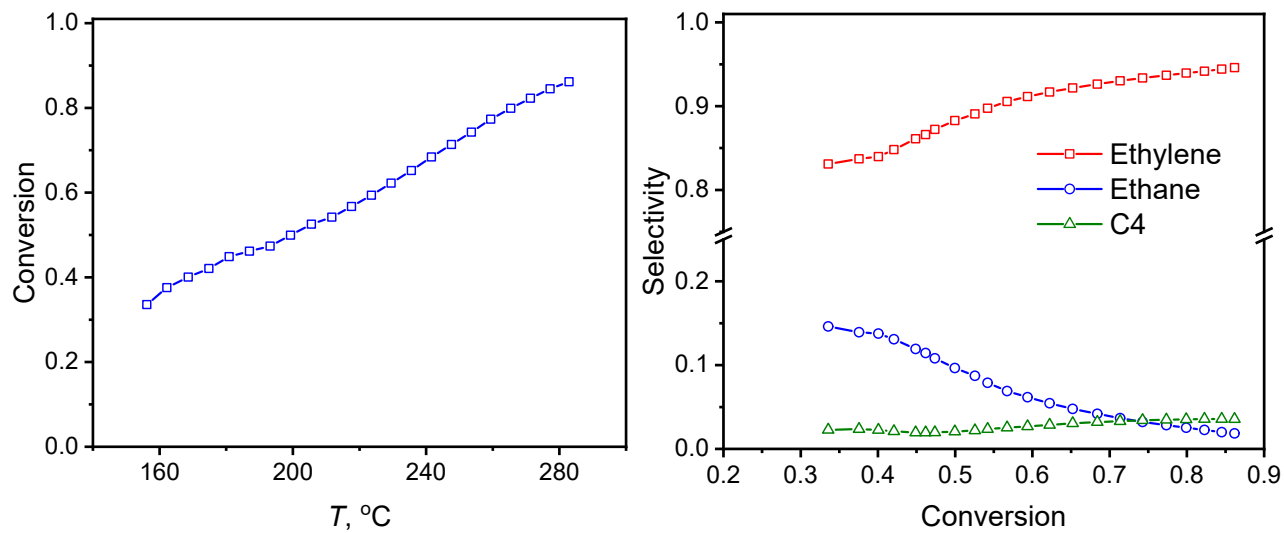

**Figure S19.** Catalytic performance of Rh-Zn/SiO<sub>2</sub>-4 catalysts in acetylene hydrogenation under the feed condition of 1% C<sub>2</sub>H<sub>2</sub>, 20% C<sub>2</sub>H<sub>4</sub>, and 4% H<sub>2</sub>.

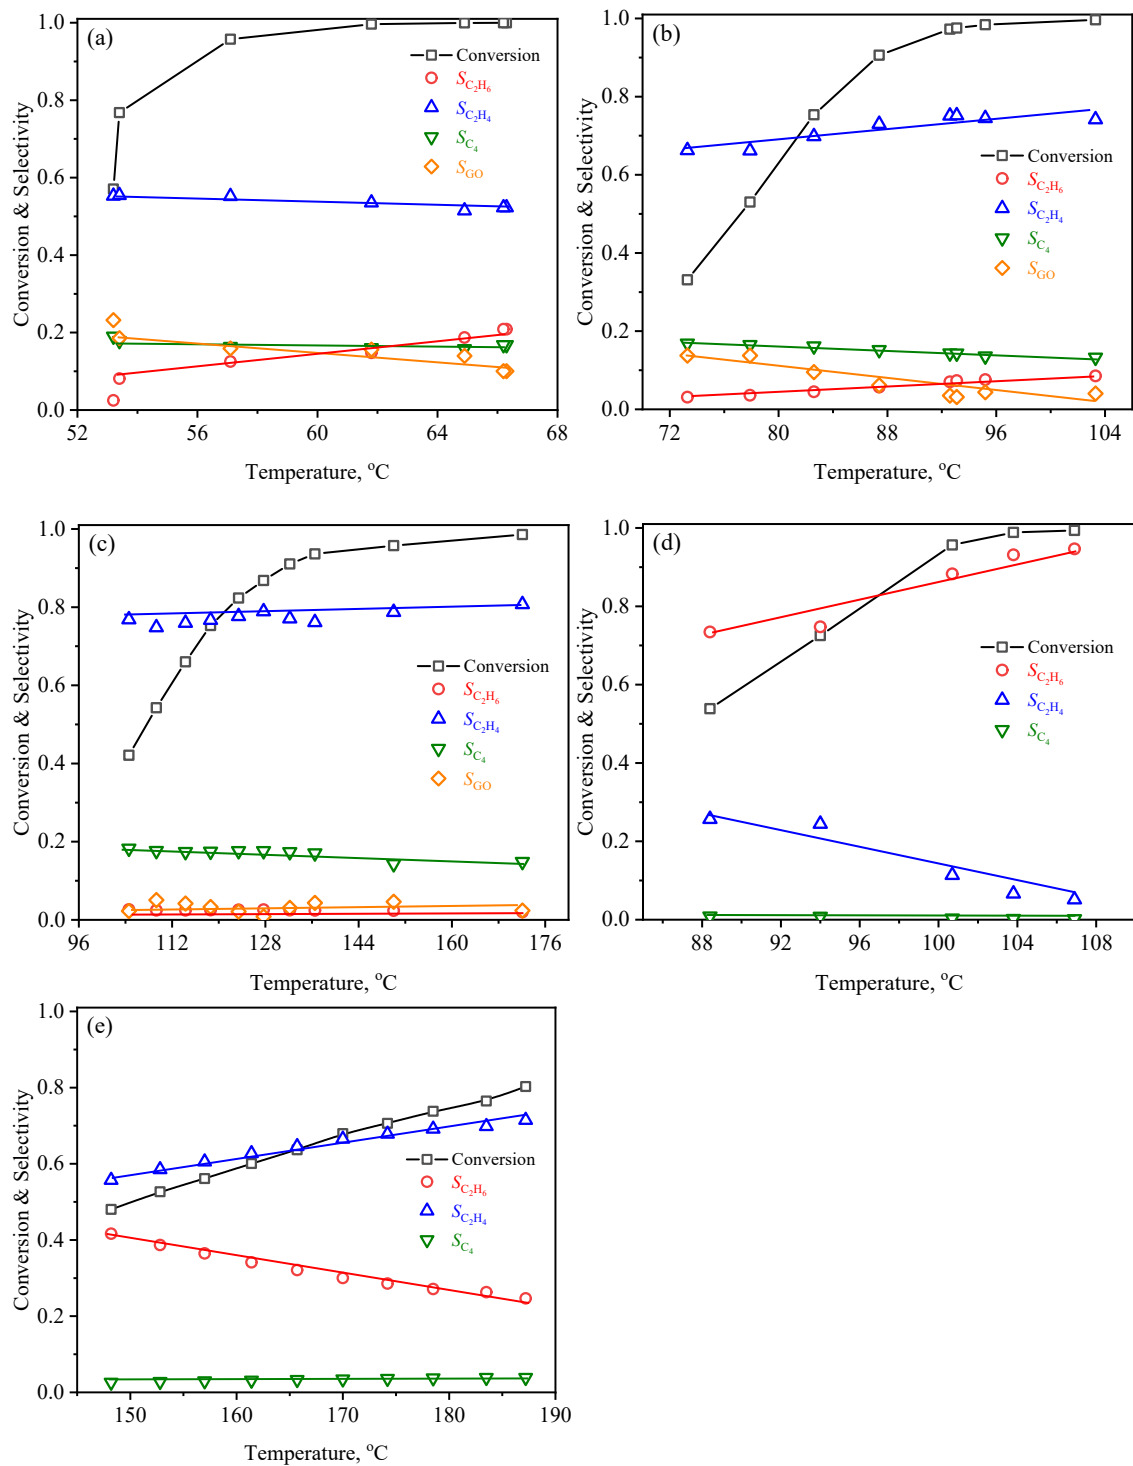

**Figure S20.** Reduction time dependent catalytic performance of Pd-Zn/SiO<sub>2</sub>-t catalysts in acetylene hydrogenation. (a) Pd-Zn/SiO<sub>2</sub>-0, (b) Pd-Zn/SiO<sub>2</sub>-2, (c) Pd-Zn/SiO<sub>2</sub>-4, (d) Pt-Zn/SiO<sub>2</sub>-0, and (e) Pt-Zn/SiO<sub>2</sub>-4.



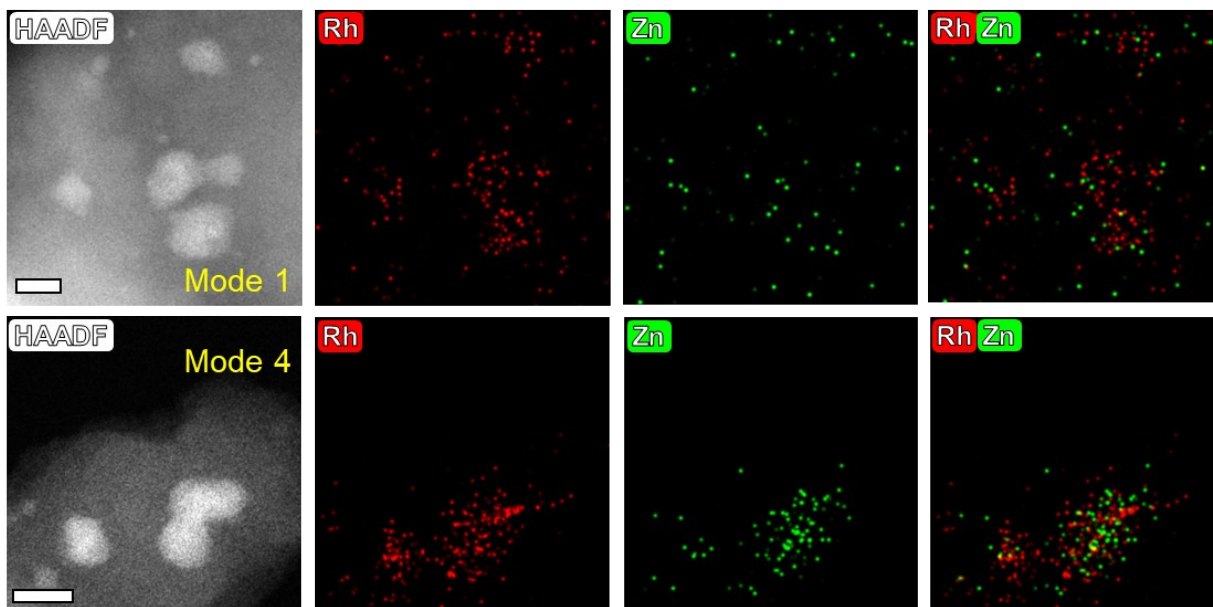

**Figure S21.** HAADF-STEM images and EDS mappings of samples in mode 1 and 4 after TPR process.

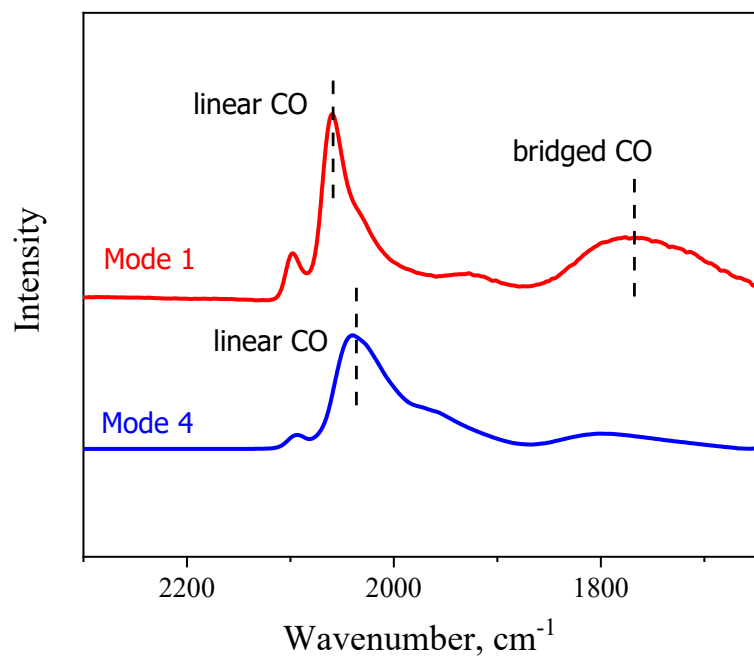

**Figure S22.** CO adsorption on the samples in mode 1 and 4 after TPR process.

**Table S1.** Comparison of the present catalysts with the reported intermetallic and alloy catalysts for acetylene semihydrogenation.

| Entry | Cat                                                    | Active Phase                       | Temp °C | Feeding ratio <sup>a</sup> | Conv % | Cal Method <sup>b</sup> | S(C <sub>2</sub> H <sub>4</sub> ) % | S(C <sub>4</sub> ) % <sup>c</sup> | Carbon loss of C <sub>2</sub> H <sub>2</sub> , % <sup>d</sup> | Ref |
|-------|--------------------------------------------------------|------------------------------------|---------|----------------------------|--------|-------------------------|-------------------------------------|-----------------------------------|---------------------------------------------------------------|-----|
| 1     | Ni <sub>3</sub> Sn                                     | Ni <sub>3</sub> Sn                 | 250     | 1:5:0                      | 100    | --                      | 68                                  | 30                                | NR                                                            | 10  |
| 2     | Ni <sub>3</sub> Ge/MCM-41                              | Ni <sub>3</sub> Ge                 | 250     | 1:2:0                      | 94     | --                      | 89                                  | 8.4                               | 0.1                                                           | 11  |
| 3     | PdGa                                                   | PdGa                               | 120     | 1:2:0                      | 50     | A                       | 80                                  | NR                                | NC                                                            | 12  |
| 4     | PdGa                                                   | PdGa                               | 200     | 1:10:100                   | 86     | B                       | 75                                  | NR                                | NC                                                            | 12  |
| 5     | PdGa                                                   | PdGa                               | 200     | 1:10:100                   | 66     | B                       | 76                                  | NR                                | NC                                                            | 13  |
| 6     | Pd <sub>2</sub> Ga                                     | Pd <sub>2</sub> Ga                 | 200     | 1:10:100                   | 94     | B                       | 75                                  | NR                                | NC                                                            | 13  |
| 7     | nano-PdGa@Al <sub>2</sub> O <sub>3</sub>               | PdGa                               | 200     | 1:10:100                   | 81     | B                       | 82                                  | NR                                | NC                                                            | 13  |
| 8     | nano-Pd <sub>2</sub> Ga@Al <sub>2</sub> O <sub>3</sub> | Pd <sub>2</sub> Ga                 | 200     | 1:10:100                   | 88     | B                       | 66                                  | NR                                | NC                                                            | 13  |
| 9     | Fe <sub>4</sub> Al <sub>13</sub>                       | Fe <sub>4</sub> Al <sub>13</sub>   | 200     | 1:10:100                   | 81     | B                       | 84                                  | 10                                | NC                                                            | 14  |
| 10    | Pd/ZnO                                                 | Pd <sub>1</sub> Zn <sub>1</sub>    | 110     | 1:10:0                     | 100    | E                       | 77                                  | 14                                | 4                                                             | 15  |
| 11    | Pd/ZnO                                                 | Pd <sub>1</sub> Zn <sub>1</sub>    | 110     | 1:10:20                    | 78     | D                       | 91                                  | NR                                | NC                                                            | 15  |
| 12    | InPd <sub>2</sub>                                      | InPd <sub>2</sub>                  | 200     | 1:10:100                   | 90     | B                       | 80                                  | NR                                | NC                                                            | 16  |
| 13    | GaPd <sub>2</sub>                                      | GaPd <sub>2</sub>                  | 200     | 1:10:100                   | 95     | B                       | 75                                  | NR                                | NC                                                            | 16  |
| 14    | Ni <sub>3</sub> Ga                                     | Ni <sub>3</sub> Ga                 | 200     | 1:20:100                   | 91     | B                       | 77                                  | 11                                | NC                                                            | 17  |
| 15    | Ni <sub>3</sub> Sn <sub>2</sub>                        | Ni <sub>3</sub> Sn <sub>2</sub>    | 200     | 1:20:100                   | 74     | B                       | 80                                  | 10                                | NC                                                            | 17  |
| 16    | PdIn/MgAl <sub>2</sub> O <sub>4</sub>                  | PdIn                               | 90      | 1:10:100                   | 95     | B                       | 90                                  | NP                                | NC                                                            | 18  |
| 17    | NiGa                                                   | NiGa                               | 240     | 1:10:0                     | 90     | C                       | 82                                  | NP                                | NC                                                            | 19  |
| 18    | Ni <sub>3</sub> ZnC <sub>0.7</sub> /oCNT               | Ni <sub>3</sub> ZnC <sub>0.7</sub> | 200     | 1:9:0                      | 100    | E                       | ~85                                 | ~9                                | ~0                                                            | 20  |
| 19    | Ni <sub>3</sub> ZnC <sub>0.7</sub> /oCNT               | Ni <sub>3</sub> ZnC <sub>0.7</sub> | 200     | 1:9:40                     | 99     | D                       | 95                                  | NR                                | NC                                                            | 20  |
| 20    | Pd <sub>1</sub> Ag <sub>3</sub> /r-TiO <sub>2</sub>    | Pd <sub>1</sub> Ag <sub>3</sub>    | 70      | 1:10:100                   | 96     | D                       | 85                                  | NR                                | NC                                                            | 21  |
| 21    | Pd <sub>1</sub> Ag <sub>3</sub> /HT                    | Pd <sub>1</sub> Ag <sub>3</sub>    | 60      | 1:10:100                   | 100    | D                       | 80                                  | NR                                | NC                                                            | 21  |
| 22    | Ni <sub>3</sub> Zn/oCNT                                | Ni <sub>3</sub> Zn                 | 160     | 1:15:0                     | 40     | E                       | 70                                  | 8                                 | 10                                                            | 1   |
| 23    | Ni <sub>3</sub> ZnC <sub>0.7</sub> /C                  | Ni <sub>3</sub> ZnC <sub>0.7</sub> | 160     | 1:15:0                     | 100    | E                       | 85                                  | 4                                 | <2                                                            | 1   |
| 24    | Ni <sub>3</sub> GaC <sub>0.5</sub>                     | Ni <sub>3</sub> GaC <sub>0.5</sub> | 110     | 1:5:20                     | 100    | C                       | 89.1                                | 4.3                               | NC                                                            | 22  |
| 25    | Pd <sub>3</sub> Bi/SiO <sub>2</sub>                    | Pd <sub>3</sub> Bi                 | 150     | 1:4:0                      | 90     | D                       | 80                                  | NR                                | NC                                                            | 23  |
| 26    | NiSb                                                   | NiSb                               | 240     | 1:5:60                     | 100    | C                       | 93.2                                | 3.6                               | NC                                                            | 24  |
| 27    | Pd <sub>8</sub> Zn <sub>44</sub>                       | Pd <sub>8</sub> Zn <sub>44</sub>   | 160     | 1:18:31                    | 87     | E                       | 85                                  | NR                                | NR                                                            | 25  |
| 28    | Pd <sub>9</sub> Zn <sub>43</sub>                       | Pd <sub>9</sub> Zn <sub>43</sub>   | 160     | 1:18:31                    | 97     | E                       | 75                                  | NR                                | NR                                                            | 25  |
| 29    | Pd <sub>8</sub> AuZn <sub>43</sub>                     | Pd <sub>8</sub> AuZn <sub>43</sub> | 160     | 1:18:31                    | 100    | E                       | 64                                  | NR                                | NR                                                            | 25  |
| 30    | CaPdH <sub>2</sub>                                     | CaPdH <sub>2</sub>                 | 100     | 1:10:0                     | 85     | E                       | 80                                  | NR                                | NR                                                            | 26  |
| 31    | PdCu                                                   | B2                                 | 25      | 1:2:1                      | 42     | --                      | ~75                                 | ~17                               | NC                                                            | 27  |
| 32    | PdCu                                                   | fcc                                | 25      | 1:2:1                      | 12     | --                      | ~70                                 | ~23                               | NC                                                            | 27  |
| 33    | Pd-Zn/SiO <sub>2</sub> -4                              | Pd <sub>1</sub> Zn <sub>1</sub>    | 172     | 1:15:0                     | 98     | E                       | 81                                  | 15                                | 2                                                             | TW  |
| 34    | Rh/SiO <sub>2</sub>                                    | Rh                                 | 150     | 1:15:0                     | 79     | E                       | 52                                  | 25                                | 13                                                            | TW  |
| 35    | RhZn/SiO <sub>2</sub> -IMP                             | Mix phase                          | 217     | 1:15:0                     | 83     | E                       | 83                                  | 5.4                               | 6                                                             | TW  |

<sup>a</sup> Volume ratio of C<sub>2</sub>H<sub>2</sub>:H<sub>2</sub>:C<sub>2</sub>H<sub>4</sub>. <sup>b</sup> Five Calculation methods, denoted as A-E, are discussed below. <sup>c</sup> Reported C<sub>4</sub> selectivity, and “NR” for no report. <sup>d</sup> Reported carbon loss or carbon balance, and “NR” for no report, “NC” for non calculable.

Several calculation methods were used to determine the selectivity in the reported works (Table S1 and S2). Method A assumes that the hydrogenation products only contain ethylene, ethane, and C<sub>4</sub>. For the acetylene hydrogenation in ethylene flow, since ethylene is in significant excess it is typically difficult to accurately detect the change of ethylene concentration coming from hydrogenation of 0.5~1% acetylene.<sup>28-29</sup> Methods B-D are proposed to indirectly calculate the ethylene selectivity by measuring ethane and C<sub>4</sub> (ethane and C<sub>4</sub> can be accurately measured because the feed does not contain these components). However, acetylene semihydrogenation is accompanied by oligomerization with the formation of GO components (deposited long chain hydrocarbons). GC for quantitative analysis only detects the light hydrocarbons of acetylene, ethylene, ethane, and C<sub>4</sub>, while GO components are not vaporizable to be detected. The formula and the neglect of GO in Methods B-D could overrate the intrinsic selectivity to C<sub>2</sub>H<sub>4</sub>. It should be specifically noted that some works only considered the ethylene and ethane products and the formula of S(C<sub>2</sub>H<sub>4</sub>) did not consider the by-products of C<sub>4</sub> and GO (Method D), which highly overrated the intrinsic selectivity to ethylene.

For the acetylene hydrogenation without ethylene, the change of ethylene concentration can be directly measured and thus the S(C<sub>2</sub>H<sub>4</sub>) can be accurately calculated by Method E. For example, as listed in Table S1 (entry 10 vs 11, and 18 vs 19), the S(C<sub>2</sub>H<sub>4</sub>) for Pd/ZnO was 91% calculated by method D (with excess ethylene in the feed) but was only 77% calculated by method E (without excess ethylene in the feed), and the S(C<sub>2</sub>H<sub>4</sub>) for Ni<sub>3</sub>ZnCo<sub>0.7</sub>/oCNT was 95% calculated by method D (with excess ethylene in the feed) but was only 85% calculated by method E (without excess ethylene in the feed). Recently, Method E was used to determine the S(C<sub>2</sub>H<sub>4</sub>) in the feed with excess of ethylene by using two different isotopes <sup>13</sup>C and <sup>12</sup>C for ethylene and acetylene, respectively (entry 27-29).

In this work, we use method E to accurately determine the intrinsic selectivity to C<sub>2</sub>H<sub>4</sub> under the feeding condition without excess ethylene. Our Rh<sub>1</sub>Zn<sub>1</sub> catalyst obtained a high intrinsic selectivity to ethylene (91%) with extremely low C<sub>4</sub> and GO formation, which outperforms the reported intermetallic and alloy catalysts for acetylene semihydrogenation.

**Table S2.** The conversion and selectivity calculation method in the reported works.

| Method | Conversion                                                    | Feed                    | Formula of S(C <sub>2</sub> H <sub>4</sub> )                                                                           | Accuracy of S(C <sub>2</sub> H <sub>4</sub> )                |
|--------|---------------------------------------------------------------|-------------------------|------------------------------------------------------------------------------------------------------------------------|--------------------------------------------------------------|
| A      | $Conv = \frac{n_{C_2H_2,in} - n_{C_2H_4,out}}{n_{C_2H_2,in}}$ | Without ethylene        | $S_{C_2H_4} = \frac{n_{C_2H_4,out}}{n_{C_2H_4,out} + n_{C_2H_6,out} + 2n_{C_4,out}}$                                   | Overrated due to the neglect of GO                           |
| B      |                                                               | With excess of ethylene | $S_{C_2H_4} = \frac{n_{C_2H_2,in} - n_{C_2H_2,out}}{n_{C_2H_2,in} - n_{C_2H_2,out} + n_{C_2H_6,out} + 2n_{C_4,out}}$   | Overrated due to the equation and the neglect of GO          |
| C      |                                                               | With excess of ethylene | $S_{C_2H_4} = 1 - \frac{n_{C_2H_6,out} - n_{C_2H_6,in} + 2(n_{C_4,out} - n_{C_4,in})}{n_{C_2H_2,in} - n_{C_2H_2,out}}$ | Overrated due to the neglect of GO                           |
| D      |                                                               | With excess of ethylene | $S_{C_2H_4} = 1 - \frac{n_{C_2H_6,out} - n_{C_2H_6,in}}{n_{C_2H_2,in} - n_{C_2H_2,out}}$                               | Highly overrated due to the neglect of C <sub>4</sub> and GO |
| E      |                                                               | Without ethylene        | $S_{C_2H_4} = \frac{n_{C_2H_4,out} - n_{C_2H_4,in}}{n_{C_2H_2,in} - n_{C_2H_2,out}}$                                   | Accurate                                                     |

**Table S3.** Comparison of Pd-Zn/SiO<sub>2</sub>-t catalysts for acetylene hydrogenation.

| Catalyst                  | Reaction <i>T</i> , °C | Con., % | S(C <sub>2</sub> H <sub>6</sub> ), % | S(C <sub>2</sub> H <sub>4</sub> ), % | S(C <sub>4</sub> ), % | S(GO), % |
|---------------------------|------------------------|---------|--------------------------------------|--------------------------------------|-----------------------|----------|
| Pd-Zn/SiO <sub>2</sub> -0 | 57                     | 96      | 13                                   | 55                                   | 16                    | 16       |
| Pd-Zn/SiO <sub>2</sub> -2 | 95                     | 98      | 8                                    | 74                                   | 14                    | 4        |
| Pd-Zn/SiO <sub>2</sub> -4 | 172                    | 98      | 2                                    | 81                                   | 15                    | 2        |

**Table S4.** Activation energy of butadiene formation on the Rh(111) and RhZn(110) surfaces (unit : eV)

|           | TS1  | TS2  | TS3  |
|-----------|------|------|------|
| Rh(111)   | 0.46 | 0.58 | 0.40 |
| RhZn(110) | 0.66 | 0.61 | 1.40 |

**Table S5.** Free energy corrected for the temperature of ZnO(g), Zn(g), H<sub>2</sub>(g) and H<sub>2</sub>O(g) at 473, 573, 673 and 773 K.

|                       | Temp (K) | ZPE (eV) | $H_{0 \rightarrow T}$ (eV) | S (eV/K) | $G_{0 \rightarrow T}$ (eV) |
|-----------------------|----------|----------|----------------------------|----------|----------------------------|
| ZnO(gas)              | 473      | 0.046    | 0.20                       | 0.00258  | -1.02                      |
|                       | 573      | 0.046    | 0.24                       | 0.00265  | -1.28                      |
|                       | 673      | 0.046    | 0.27                       | 0.00271  | -1.55                      |
|                       | 773      | 0.046    | 0.31                       | 0.00276  | -1.82                      |
| Zn(gas)               | 473      | 0.00     | 0.10                       | 0.00177  | -0.73                      |
|                       | 573      | 0.00     | 0.12                       | 0.00181  | -0.91                      |
|                       | 673      | 0.00     | 0.14                       | 0.00184  | -1.10                      |
|                       | 773      | 0.00     | 0.17                       | 0.00187  | -1.28                      |
| H <sub>2</sub> (gas)  | 473      | 0.27     | 0.41                       | 0.00149  | -0.30                      |
|                       | 573      | 0.27     | 0.44                       | 0.00155  | -0.45                      |
|                       | 673      | 0.27     | 0.47                       | 0.00160  | -0.61                      |
|                       | 773      | 0.27     | 0.50                       | 0.00164  | -0.77                      |
| H <sub>2</sub> O(gas) | 473      | 0.56     | 0.73                       | 0.00212  | -0.27                      |
|                       | 573      | 0.56     | 0.77                       | 0.00219  | -0.49                      |
|                       | 673      | 0.56     | 0.80                       | 0.00225  | -0.71                      |
|                       | 773      | 0.56     | 0.84                       | 0.00231  | -0.94                      |

**Table S6.** Free energy changes  $\Delta G_T(1)$ ,  $\Delta G_T(2)$  and  $\Delta G_T(3)$  corrected for the temperature.

| Temp (K) | $\delta G_T(1)$ (eV) | $\Delta G_T(1)$ (eV) | $\delta G_T(2)$ (eV) | $\Delta G_T(2)$ (eV) | $\delta G_T(3)$ (eV) | $\Delta G_T(3)$ (eV) |
|----------|----------------------|----------------------|----------------------|----------------------|----------------------|----------------------|
| 0        | 0                    | 4.82                 | 0                    | 1.14                 | 0                    | -2.19                |
| 473      | -1.02                | 3.81                 | -0.27                | 0.43                 | 0.73                 | -1.46                |
| 573      | -1.28                | 3.54                 | -0.49                | 0.18                 | 0.91                 | -1.28                |
| 673      | -1.55                | 3.28                 | -0.71                | -0.06                | 1.10                 | -1.10                |
| 773      | -1.82                | 3.00                 | -0.94                | -0.31                | 1.28                 | -0.91                |

Details of the free energy calculation

The chemical equations are summarized as

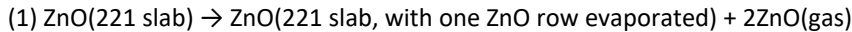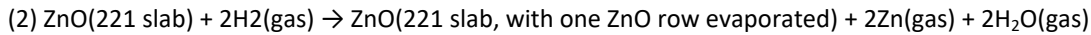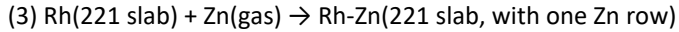

The model for equations (1) and (2) was established using the (221) surface of ZnO and one row of ZnO was evaporated from the step. Typically, in each slab, two Zn and two O atoms were evaporated.

Thus, the energy changes at 0 K (neglecting zero point energy (ZPE)) are:

$$\Delta E_0(1) = (E_{\text{ZnO}(221 \text{ slab, with one ZnO row evaporated})} + 2E_{\text{ZnO}(\text{gas})} - E_{\text{ZnO}(221 \text{ slab})})/2 = 4.82 \text{ eV}$$

$$\Delta E_0(2) = (E_{\text{ZnO}(221 \text{ slab, with one ZnO row evaporated})} + 2E_{\text{Zn}(\text{gas})} + 2E_{\text{H}_2\text{O}(\text{gas})} - E_{\text{ZnO}(\text{hydrogenated } 221 \text{ slab})} - 2E_{\text{H}_2(\text{gas})})/2 = 1.14 \text{ eV}$$

The model for equation (3) was established using the Rh(221) surface, and one row of Zn was formed at the step.

Thus, the energy changes at 0 K (neglecting ZEP) are:

$$\Delta E_0(3) = E_{\text{Rh-Zn}(221 \text{ slab, with one row Zn})} - E_{\text{Rh}(221 \text{ slab})} - E_{\text{Zn}(\text{gas})} = -2.19 \text{ eV}$$

The adjustment of Gibbs free energy of the gas components (Table S5) was calculated using the following equation:

$$G_{0 \rightarrow T} = H_{0 \rightarrow T} - T \times S$$

Thus, the Gibbs free energy of each chemical equation (Table S6) was

$$\Delta G_T = G_{T, \text{product}} - G_{T, \text{reactant}} = \Delta E_0 + \delta G_T$$

where,

$$\delta G_T(1) = G_{0 \rightarrow T}(\text{ZnO})$$

$$\delta G_T(2) = G_{0 \rightarrow T}(\text{Zn}) + G_{0 \rightarrow T}(\text{H}_2\text{O}) - G_{0 \rightarrow T}(\text{H}_2)$$

$$\delta G_T(3) = -G_{0 \rightarrow T}(\text{Zn})$$



## Reference

1. Wang, Y.; Liu, B.; Lan, X.; Wang, T., Subsurface Carbon as a Selectivity Promotor to Enhance Catalytic Performance in Acetylene Semihydrogenation. *ACS Catal.* **2021**, *11* (16), 10257-10266.
2. Kresse, G.; Furthmüller, J., Efficiency of ab-initio total energy calculations for metals and semiconductors using a plane-wave basis set. *Computational Mater. Sci.* **1996**, *6* (1), 15-50.
3. Kresse, G.; Furthmüller, J., Efficient iterative schemes for ab initio total-energy calculations using a plane-wave basis set. *Phys. Rev. B* **1996**, *54* (16), 11169-11186.
4. Blöchl, P. E., Projector augmented-wave method. *Phys. Rev. B Condens. Matter.* **1994**, *50* (24), 17953-17979.
5. Kresse, G.; Joubert, D., From ultrasoft pseudopotentials to the projector augmented-wave method. *Phys. Rev. B* **1999**, *59* (3), 1758-1775.
6. Perdew, J. P.; Burke, K.; Ernzerhof, M., Generalized Gradient Approximation Made Simple. *Phys. Rev. Lett.* **1996**, *77* (18), 3865-3868.
7. Henkelman, G.; Uberuaga, B. P.; Jónsson, H., A climbing image nudged elastic band method for finding saddle points and minimum energy paths. *J. Chem. Phys.* **2000**, *113* (22), 9901-9904.
8. Jain, A.; Ong, S. P.; Hautier, G.; Chen, W.; Richards, W. D.; Dacek, S.; Cholia, S.; Gunter, D.; Skinner, D.; Ceder, G.; Persson, K. A., Commentary: The Materials Project: A materials genome approach to accelerating materials innovation. *APL Mater.* **2013**, *1* (1), 011002.
9. Wang, V.; Xu, N.; Liu, J.-C.; Tang, G.; Geng, W.-T., VASPKit: A user-friendly interface facilitating high-throughput computing and analysis using VASP code. *Comput. Phys. Commun.* **2021**, *267*, 108033.
10. Onda, A.; Komatsu, T.; Yashima, T., Characterization and catalytic properties of Ni-Sn intermetallic compounds in acetylene hydrogenation. *Phys. Chem. Chem. Phys.* **2000**, *2* (13), 2999-3005.
11. Komatsu, T.; Kishi, T.; Gorai, T., Preparation and catalytic properties of uniform particles of Ni<sub>3</sub>Ge intermetallic compound formed inside the mesopores of MCM-41. *J. Catal.* **2008**, *259* (2), 174-182.
12. Osswald, J.; Kovnir, K.; Armbrüster, M.; Giedigkeit, R.; Jentoft, R. E.; Wild, U.; Grin, Y.; Schlögl, R., Palladium-gallium intermetallic compounds for the selective hydrogenation of acetylene: Part II: Surface characterization and catalytic performance. *J. Catal.* **2008**, *258* (1), 219-227.
13. Armbrüster, M.; Wowsnick, G.; Friedrich, M.; Heggen, M.; Cardoso-Gil, R., Synthesis and catalytic properties of nanoparticulate intermetallic Ga-Pd compounds. *J. Am. Chem. Soc.* **2011**, *133* (23), 9112-9118.
14. Armbrüster, M.; Kovnir, K.; Friedrich, M.; Teschner, D.; Wowsnick, G.; Hahne, M.; Gille, P.; Szentmiklósi, L.; Feuerbacher, M.; Heggen, M.; Girgsdies, F.; Rosenthal, D.; Schlögl, R.; Grin, Y., Al<sub>13</sub>Fe<sub>4</sub> as a low-cost alternative for palladium in heterogeneous hydrogenation. *Nat. Mater.* **2012**, *11* (8), 690-693.
15. Zhou, H.; Yang, X.; Li, L.; Liu, X.; Huang, Y.; Pan, X.; Wang, A.; Li, J.; Zhang, T., PdZn intermetallic nanostructure with Pd-Zn-Pd ensembles for highly active and chemoselective semi-hydrogenation of acetylene. *ACS Catal.* **2016**, *6* (2), 1054-1061.
16. Luo, Y.; Alarcón Villaseca, S.; Friedrich, M.; Teschner, D.; Knop-Gericke, A.; Armbrüster, M., Addressing electronic effects in the semi-hydrogenation of ethyne by InPd<sub>2</sub> and intermetallic Ga-Pd compounds. *J. Catal.* **2016**, *338*, 265-272.
17. Liu, Y.; Liu, X.; Feng, Q.; He, D.; Zhang, L.; Lian, C.; Shen, R.; Zhao, G.; Ji, Y.; Wang, D.; Zhou, G.; Li, Y., Intermetallic Ni<sub>x</sub>M<sub>y</sub> (M = Ga and Sn) nanocrystals: a non-precious metal catalyst for semi-hydrogenation of alkynes. *Adv. Mater.* **2016**, *28* (23), 4747-4754.
18. Feng, Q.; Zhao, S.; Wang, Y.; Dong, J.; Chen, W.; He, D.; Wang, D.; Yang, J.; Zhu, Y.; Zhu, H.; Gu, L.; Li, Z.; Liu, Y.; Yu, R.; Li, J.; Li, Y., Isolated single-atom Pd sites in intermetallic nanostructures: high catalytic selectivity for semihydrogenation of alkynes. *J. Am. Chem. Soc.* **2017**, *139* (21), 7294-7301.
19. Cao, Y.; Zhang, H.; Ji, S.; Sui, Z.; Jiang, Z.; Wang, D.; Zaera, F.; Zhou, X.; Duan, X.; Li, Y., Adsorption site regulation to guide atomic design of ni-ga catalysts for acetylene semi-hydrogenation. *Angew. Chem. Int. Ed.* **2020**, *59* (28), 11647-11652.
20. Niu, Y.; Huang, X.; Wang, Y.; Xu, M.; Chen, J.; Xu, S.; Willinger, M.-G.; Zhang, W.; Wei, M.; Zhang, B., Manipulating interstitial carbon atoms in the nickel octahedral site for highly efficient hydrogenation of alkyne. *Nat. Commun.* **2020**, *11* (1), 3324.
21. Li, X.-T.; Chen, L.; Shang, C.; Liu, Z.-P., In situ surface structures of PdAg catalyst and their influence on acetylene semihydrogenation revealed by machine learning and experiment. *J. Am. Chem. Soc.* **2021**, *143* (16), 6281-6292.
22. Ge, X.; Ren, Z.; Cao, Y.; Liu, X.; Zhang, J.; Qian, G.; Gong, X.; Chen, L.; Zhou, X.; Yuan, W.; Duan, X., Enhanced acetylene semi-hydrogenation on a subsurface carbon tailored Ni-Ga intermetallic catalyst. *J. Mater. Chem. A* **2022**, *10* (37), 19722-19731.
23. Zhang, W.; Zhang, X.; Wang, J.; Ghosh, A.; Zhu, J.; LiBretto, N. J.; Zhang, G.; Dartye, A. K.; Liu, W.; Miller, J. T., Bismuth-modulated surface structural evolution of Pd<sub>3</sub>Bi intermetallic alloy catalysts for selective propane dehydrogenation and acetylene semihydrogenation. *ACS Catal.* **2022**, *12* (17), 10531-10545.
24. Ge, X.; Dou, M.; Cao, Y.; Liu, X.; Yuwen, Q.; Zhang, J.; Qian, G.; Gong, X.; Zhou, X.; Chen, L.; Yuan, W.; Duan, X., Mechanism driven design of trimer Ni<sub>1</sub>Sb<sub>2</sub> site delivering superior hydrogenation selectivity to ethylene. *Nat. Commun.* **2022**, *13* (1), 5534.
25. Dasgupta, A.; He, H.; Gong, R.; Shang, S.-L.; Zimmerer, E. K.; Meyer, R. J.; Liu, Z.-K.; Janik, M. J.; Rioux, R. M., Atomic control of active-site ensembles in ordered alloys to enhance hydrogenation selectivity. *Nat. Chem.* **2022**, *14* (5), 523-529.
26. Guo, Q.; Chen, R.; Guo, J.; Qin, C.; Xiong, Z.; Yan, H.; Gao, W.; Pei, Q.; Wu, A.; Chen, P., Enabling semihydrogenation of alkynes to alkenes by using a calcium palladium complex hydride. *J. Am. Chem. Soc.* **2021**, *143* (49), 20891-20897.
27. Liu, S.; Li, Y.; Yu, X.; Han, S.; Zhou, Y.; Yang, Y.; Zhang, H.; Jiang, Z.; Zhu, C.; Li, W.-X.; Wöll, C.; Wang, Y.; Shen, W., Tuning crystal-phase of bimetallic single-nanoparticle for catalytic hydrogenation. *Nat. Commun.* **2022**, *13* (1), 4559.
28. Borodziński, A.; Bond, G. C., Selective hydrogenation of ethyne in ethene-rich streams on palladium catalysts. Part 1. effect of changes to the catalyst during reaction. *Catal. Rev.* **2006**, *48* (2), 91-144.
29. Borodziński, A.; Bond, G. C., Selective hydrogenation of ethyne in ethene-rich streams on palladium catalysts, Part 2: steady-state kinetics and effects of palladium particle size, carbon monoxide, and promoters. *Catal. Rev.* **2008**, *50* (3), 379-469.
